# Supplementary material
Source: publisher figshare collection journal article supplement (https://geolsoc.figshare.com/ndownloader/files/24734213)

Brachiopod-dominated communities and depositional environment of the Guanshan *Konservat*-*Lagerstätte*, eastern Yunnan

Feiyang Chen1, 2, Glenn A. Brock1, 2, Zhiliang Zhang1, 2, Brittany Laing2, 3, Xinyi Ren1 and Zhifei Zhang1*

1State Key Laboratory of Continental Dynamics, Shaanxi Key Laboratory of Early Life & Environments and Department of Geology, Northwest University, Xi’an, 710069, China

2Department of Biological Sciences, Macquarie University, Sydney, New South Wales 2109, Australia

3Department of Geological Sciences, University of Saskatchewan, Saskatoon, SK S7N 5E2, Canada

*Correspondence:elizf@nwu.edu.cn; [zhangelle@126.com](mailto:zhangelle@126.com)

Supplementary material:

Figure 1

Table 1

Fig. S1. Pie charts of relative abundance for the Malong Fauna and the Guanshan Biota. Note the rising relative abundance of brachiopods in the Guanshan Biota. The data for (a) comes from Luo *et al.* (2008), (b) is based on this study, (c) is modified from Figure 3 in Chen *et al.* (2019).


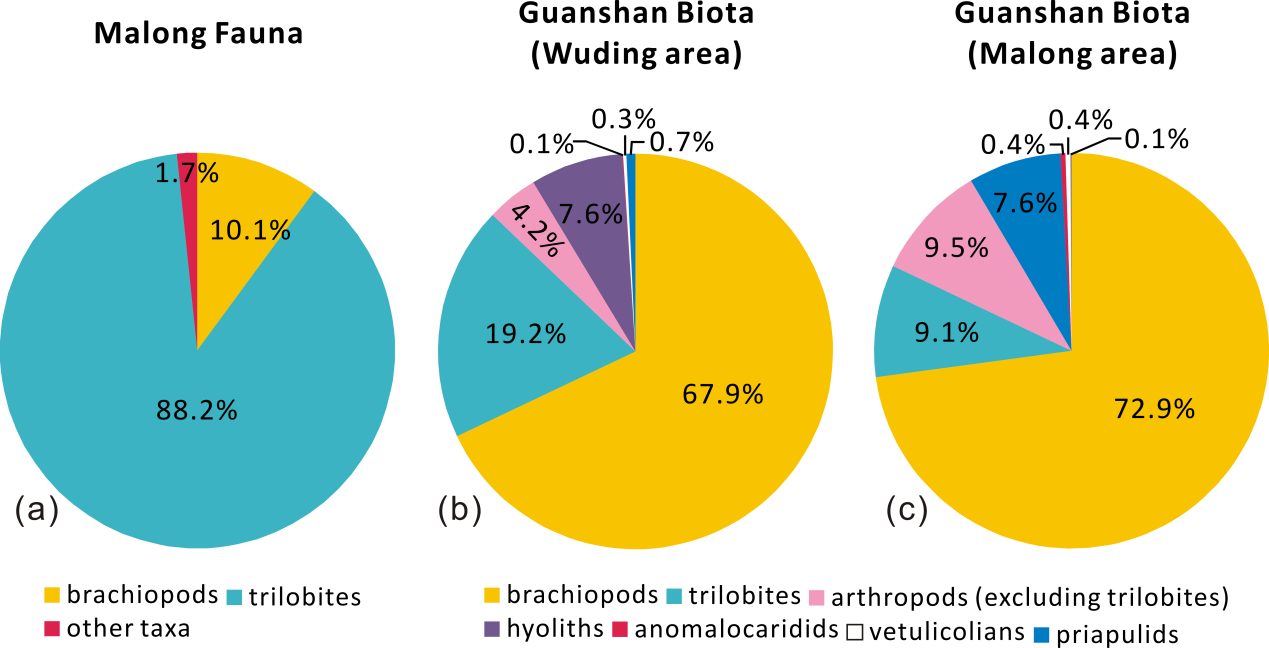


Table S1. Faunal composition of the Malong Fauna and the Guanshan Biota, note the rising diversity of brachiopods and decreasing of trilobites in the Guanshan Biota compared to the older Malong Fauna (modified from Chen *et al.*, 2019, Table 1). Fossils from the Shijiangjun section at Wuding area are indicated in blue.


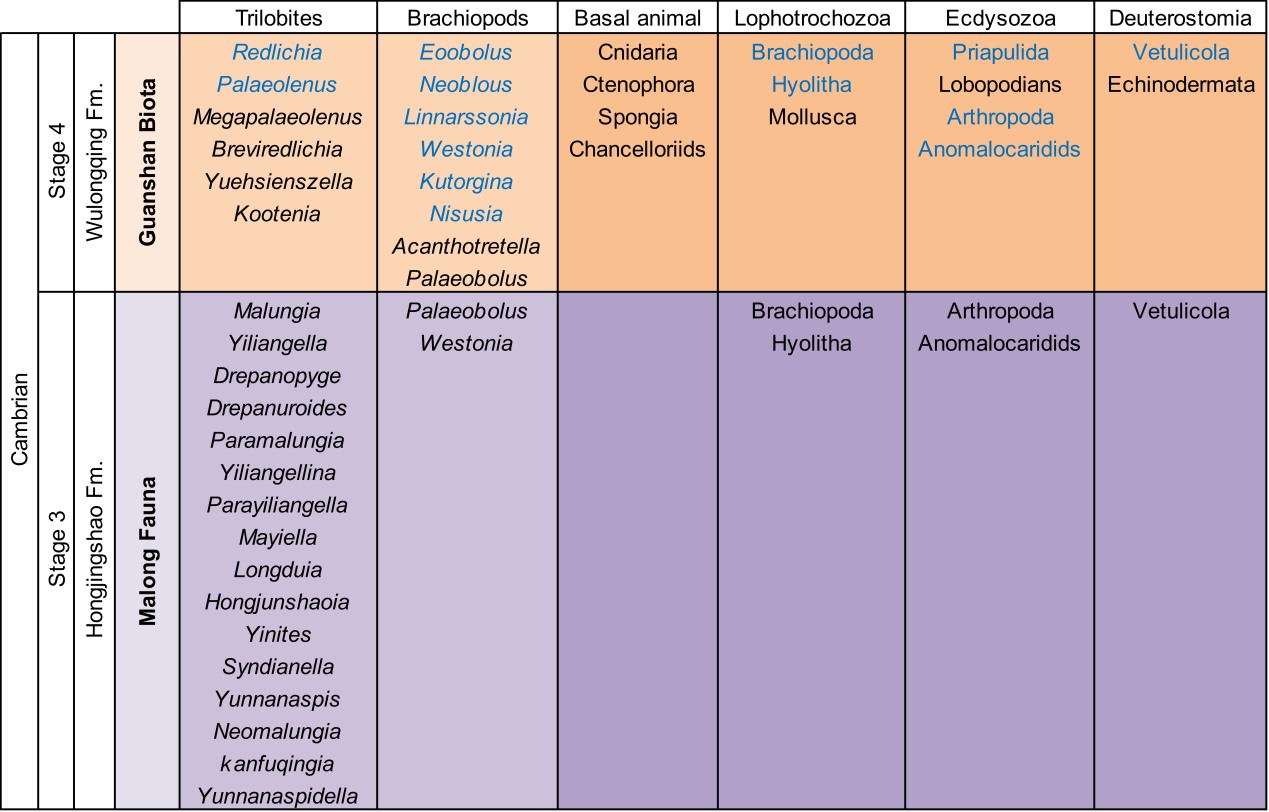

Supplement: Supplementary file 1 [file 24734213]
